# Supplementary material
Source: publisher figshare collection journal article supplement (https://gsajournals.figshare.com/ndownloader/files/28005756)
Supplement: Supplementary file 1 [file 28005756]

**
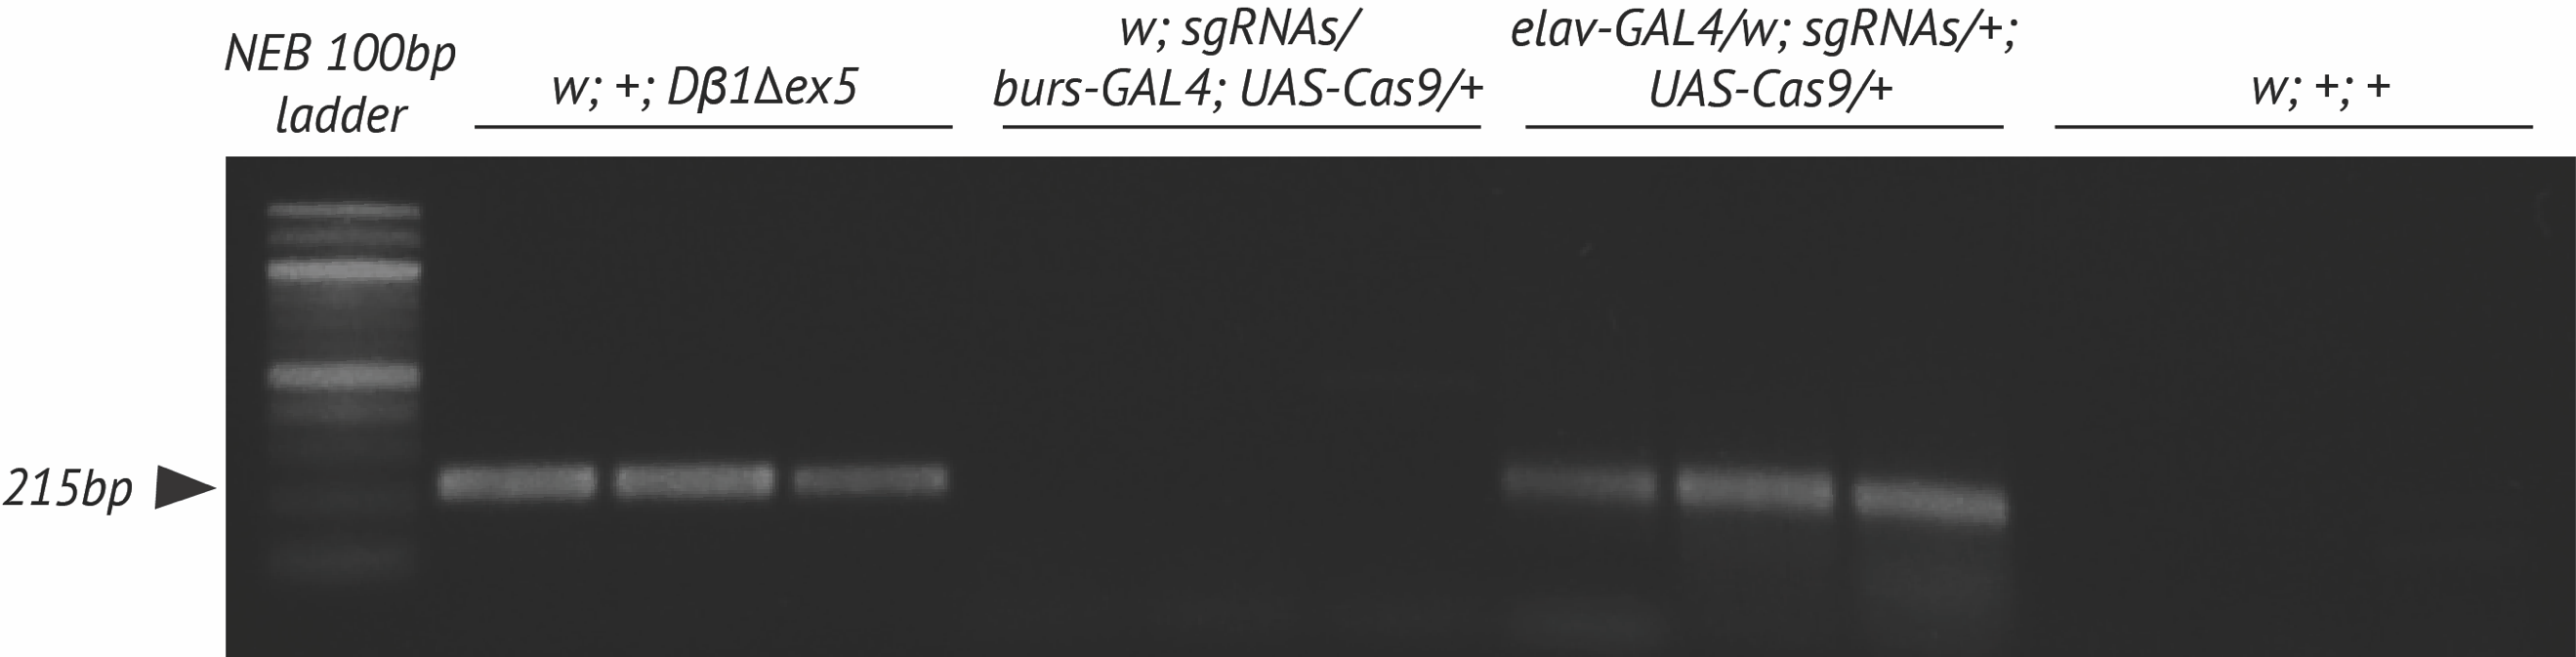
**

**Figure S8 CRISPR editing is not detected in *burs-*GAL4 CRISPR flies**

DNA was extracted from pooled samples of 10 adult flies, and deletions in *Dβ1* detected using *Dβ1_5’UTR_sgRNA_HMA_F/Dβ1_sgRNA2_HMA_R* primers. Deletions were detected in all *Dβ1Δex5* and *elav*-GAL4 CRISPR samples, but not in *burs-*GAL4 CRISPR samples or wAC9 controls. Primer sequences are available in Table S3.
